# Supplementary material for: A Large Prospective Investigation of Sleep Duration, Weight Change, and Obesity in the NIH-AARP Diet and Health Study Cohort
Source: Oxford University Press journal article supplement (doi:10.1093/aje/kwt180), 2013-09-18
Supplement: kwt180_Supplementary_Data.zip [file kwt180_Supplementary_Data.zip]

Archive with 1 entries (1 files):
- kwt180supp.pdf
