# Supplementary material for: A Large Prospective Investigation of Sleep Duration, Weight Change, and Obesity in the NIH-AARP Diet and Health Study Cohort
Source: Oxford University Press journal article supplement (doi:10.1093/aje/kwt180), 2013-09-18
Supplement: kwt180_Supplementary_Data.zip [file kwt180_Supplementary_Data.zip › kwt180supp.pdf]

**Web Table 1** Prospective associations of sleep duration at baseline and  $\geq 5$  kg weight gain during follow-up, by sex and disease status among participants who were excluded, NIH-AARP Diet and Health study, 1995-2004.

|                                                                                                      | Sleep duration    |                   |        |                   | P value<br>for trend |
|------------------------------------------------------------------------------------------------------|-------------------|-------------------|--------|-------------------|----------------------|
|                                                                                                      | <5 hr             | 5-6 hr            | 7-8 hr | 9+ hr             |                      |
| MEN                                                                                                  |                   |                   |        |                   |                      |
| Subjects with cardiovascular disease at baseline                                                     |                   |                   |        |                   |                      |
| OR (95% CI) <sup>a</sup>                                                                             | 1.04 (0.82, 1.35) | 1.04 (0.96, 1.14) | ref    | 1.02 (0.82, 1.27) | 0.40                 |
| Subjects with cancer at baseline                                                                     |                   |                   |        |                   |                      |
| OR (95% CI) <sup>a</sup>                                                                             | 1.19 (0.66, 2.17) | 1.09 (0.89, 1.33) | ref    | 0.61 (0.33, 1.14) | 0.11                 |
| Subjects who were healthy <sup>c</sup> at baseline but developed cardiovascular disease in follow up |                   |                   |        |                   |                      |
| OR (95% CI) <sup>a</sup>                                                                             | 0.79 (0.50, 1.26) | 0.98 (0.84, 1.15) | ref    | 1.02 (0.68, 1.54) | 0.48                 |
| Subjects who were healthy <sup>c</sup> at baseline but developed cancer in follow up                 |                   |                   |        |                   |                      |
| OR (95% CI) <sup>a</sup>                                                                             | 0.92 (0.64, 1.34) | 1.08 (0.98, 1.20) | ref    | 0.97 (0.74, 1.28) | 0.24                 |
| WOMEN                                                                                                |                   |                   |        |                   |                      |
| Subjects with cardiovascular disease at baseline                                                     |                   |                   |        |                   |                      |
| OR (95% CI) <sup>a</sup>                                                                             | 1.21 (0.90, 1.63) | 1.10 (0.96, 1.27) | ref    | 1.19 (0.86, 1.66) | 0.26                 |
| Subjects with cancer at baseline                                                                     |                   |                   |        |                   |                      |
| OR (95% CI) <sup>a</sup>                                                                             | 1.17 (0.78, 1.74) | 1.17 (0.98, 1.39) | ref    | 1.08 (0.71, 1.63) | 0.14                 |
| Subjects who were healthy <sup>c</sup> at baseline but developed cardiovascular disease in follow up |                   |                   |        |                   |                      |
| OR (95% CI) <sup>a</sup>                                                                             | 1.01 (0.59, 1.72) | 1.09 (0.88, 1.35) | ref    | 0.91 (0.49, 1.66) | 0.46                 |
| Subjects who were healthy <sup>c</sup> at baseline but developed cancer in follow up                 |                   |                   |        |                   |                      |
| OR (95% CI) <sup>a</sup>                                                                             | 0.92 (0.61, 1.40) | 1.05 (0.92, 1.20) | ref    | 1.17 (0.84, 1.64) | 1.00                 |

<sup>a</sup> Adjusted for age, baseline body mass index, race/ethnicity, marital status, education, self-reported health, smoking, alcohol drinking, and coffee consumption

Abbreviation: OR, odds ratio; CI, confidence interval

**Web Table 2** Prospective associations of sleep duration at baseline and  $\geq 5$  kg weight gain during follow-up, before and after applying series of exclusion criteria based on disease status, NIH-AARP Diet and Health study, 1995-2004.

|                                                                                                          | Sleep duration    |                   |        |                   | P value<br>for trend |
|----------------------------------------------------------------------------------------------------------|-------------------|-------------------|--------|-------------------|----------------------|
|                                                                                                          | <5 hr             | 5-6 hr            | 7-8 hr | 9+ hr             |                      |
| MEN                                                                                                      |                   |                   |        |                   |                      |
| All subjects <sup>a</sup>                                                                                |                   |                   |        |                   |                      |
| OR (95% CI) <sup>b</sup>                                                                                 | 1.21 (1.08, 1.35) | 1.07 (1.03, 1.11) | ref    | 1.07 (0.97, 1.19) | <0.001               |
| After excluding those who had cancer and cardiovascular diseases at baseline                             |                   |                   |        |                   |                      |
| OR (95% CI) <sup>b</sup>                                                                                 | 1.24 (1.08, 1.41) | 1.08 (1.03, 1.13) | ref    | 1.10 (0.98, 1.24) | <0.001               |
| After further excluding those who developed cancer and cardiovascular diseases in follow-up <sup>c</sup> |                   |                   |        |                   |                      |
| OR (95% CI) <sup>b</sup>                                                                                 | 1.29 (1.08, 1.53) | 1.10 (1.04, 1.16) | ref    | 1.17 (1.00, 1.36) | 0.002                |
| WOMEN                                                                                                    |                   |                   |        |                   |                      |
| All subjects <sup>a</sup>                                                                                |                   |                   |        |                   |                      |
| OR (95% CI) <sup>b</sup>                                                                                 | 1.20 (1.08, 1.34) | 1.12 (1.07, 1.17) | ref    | 1.07 (0.96, 1.19) | <0.001               |
| After excluding those who had cancer and cardiovascular diseases at baseline                             |                   |                   |        |                   |                      |
| OR (95% CI) <sup>b</sup>                                                                                 | 1.25 (1.11, 1.41) | 1.12 (1.07, 1.17) | ref    | 1.06 (0.94, 1.19) | <0.001               |
| After further excluding those who developed cancer and cardiovascular diseases in follow-up <sup>c</sup> |                   |                   |        |                   |                      |
| OR (95% CI) <sup>b</sup>                                                                                 | 1.30 (1.12, 1.51) | 1.12 (1.06, 1.18) | ref    | 1.02 (0.88, 1.17) | <0.001               |

<sup>a</sup> After excluding participants based on other exclusion/inclusion criteria (detailed in methods).

<sup>b</sup> Adjusted for age, baseline body mass index, race/ethnicity, marital status, education, self-reported health, smoking, alcohol drinking, and coffee consumption

<sup>c</sup> Results are from table 4 (model 2) and included here for comparison

Abbreviation: OR, odds ratio; CI, confidence interval
